# Supplementary material for: PyroTRF-ID: a novel bioinformatics methodology for the affiliation of terminal-restriction fragments using 16S rRNA gene pyrosequencing data
Source: PubMed Central journal article supplement (PMC3566925; doi:10.1186/1471-2180-12-306), 2012-12-27
Supplement: 1471-2180-12-306-S2.pdf [file 1471-2180-12-306-S2.pdf]

**Additional file 2**

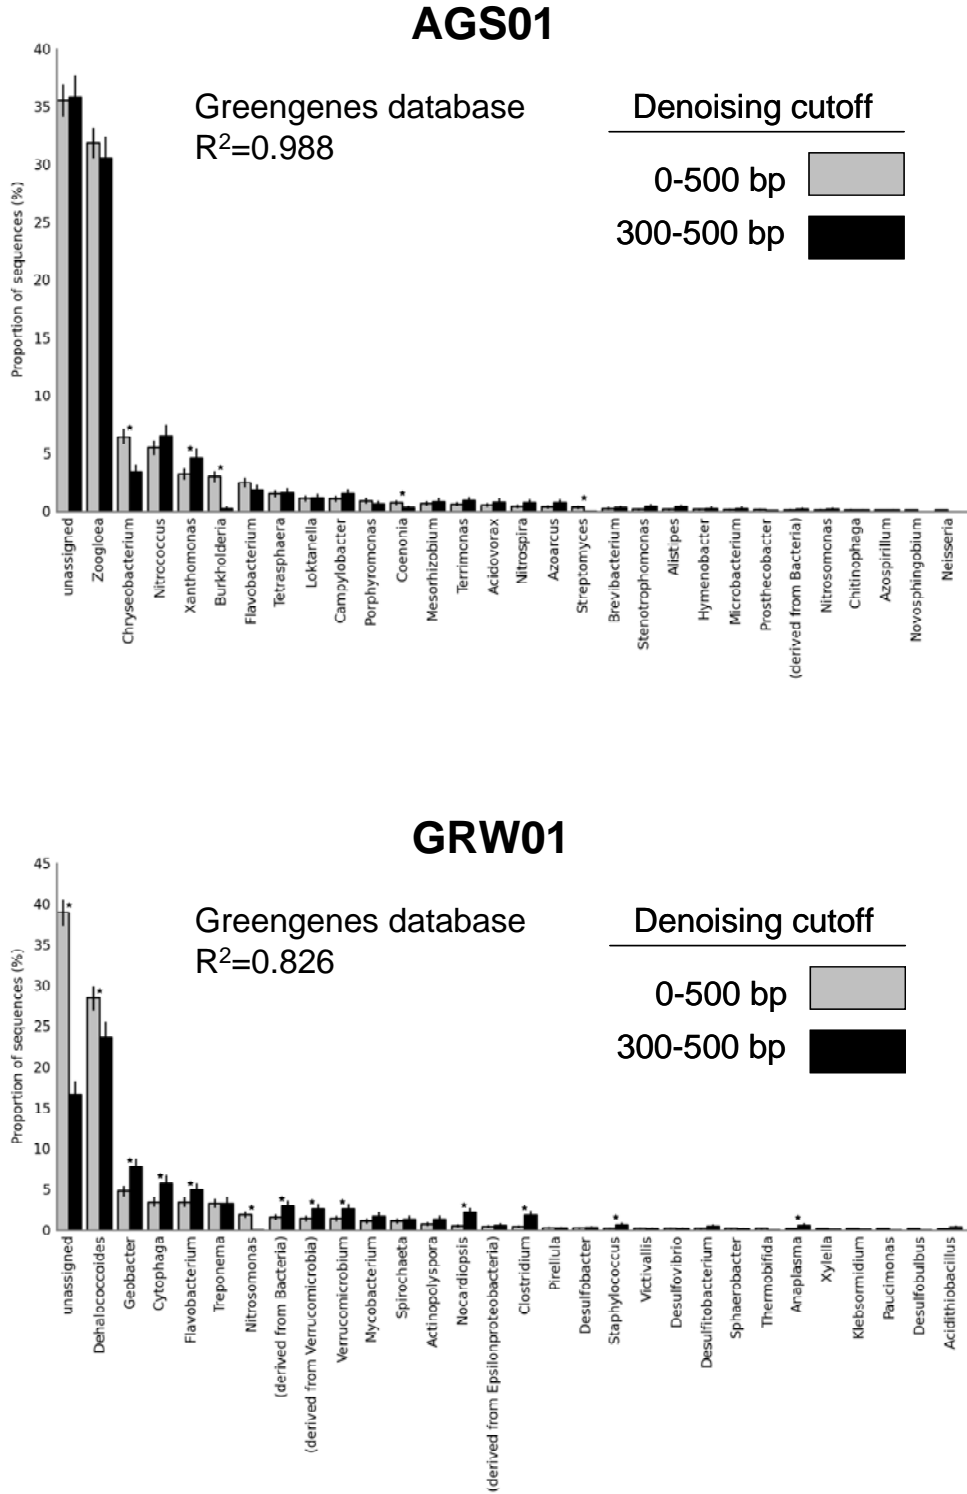

**Figure AF2.1 – Comparison of bacterial community profiles obtained with the two denoising processes, after mapping with Greengenes. The first 30 predominant populations are shown.**

## AGS01

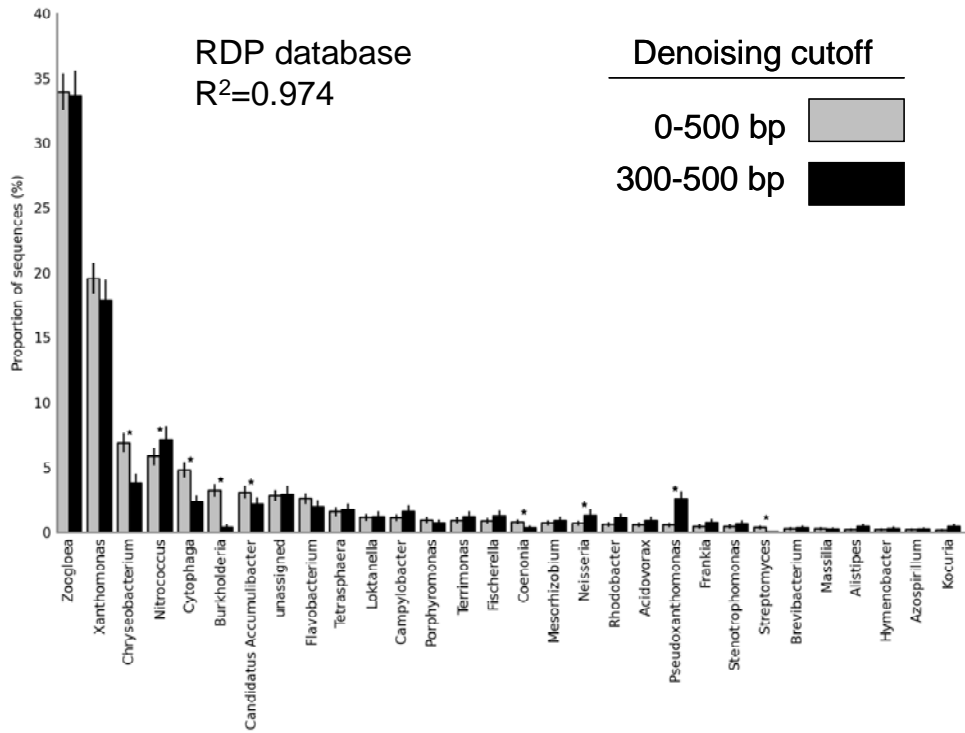

## GRW01

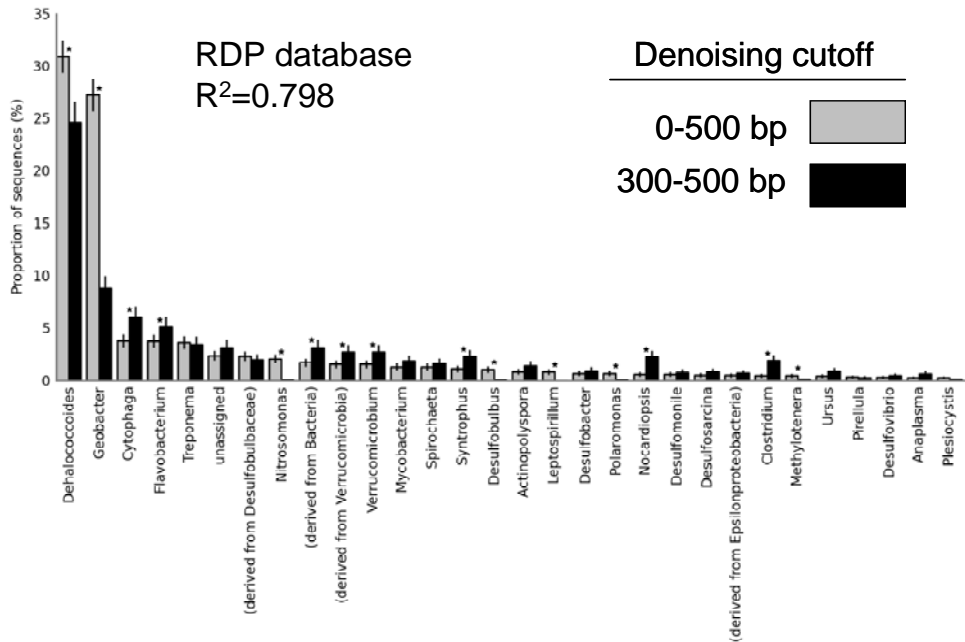

**Figure AF2.2 – Comparison of bacterial community profiles obtained with the two denoising processes, after mapping with RDP. The first 30 predominant populations are shown.**
