# Supplementary material for: PyroTRF-ID: a novel bioinformatics methodology for the affiliation of terminal-restriction fragments using 16S rRNA gene pyrosequencing data
Source: PubMed Central journal article supplement (PMC3566925; doi:10.1186/1471-2180-12-306), 2012-12-27
Supplement: 1471-2180-12-306-S4.pdf [file 1471-2180-12-306-S4.pdf]

**Additional file 4**

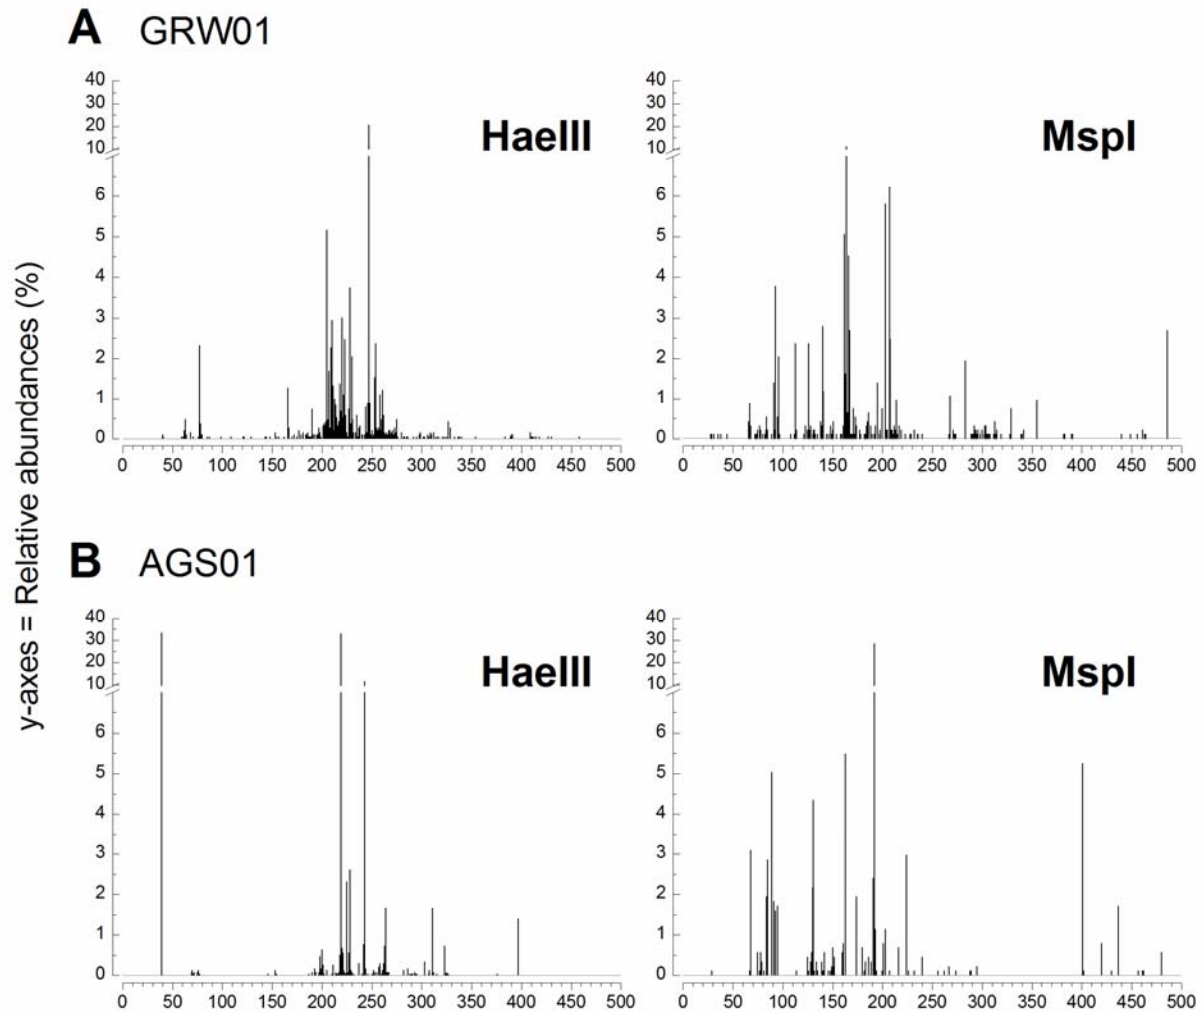

**Figure AF4.1 – Examples of full digital T-RFLP profiles obtained with the restriction enzymes *HaeIII* and *MspI* for the samples GRW01 (A) and AGS01 (B).**
