# Supplementary material for: PyroTRF-ID: a novel bioinformatics methodology for the affiliation of terminal-restriction fragments using 16S rRNA gene pyrosequencing data
Source: PubMed Central journal article supplement (PMC3566925; doi:10.1186/1471-2180-12-306), 2012-12-27
Supplement: 1471-2180-12-306-S6.pdf [file 1471-2180-12-306-S6.pdf]

**Additional file 6**

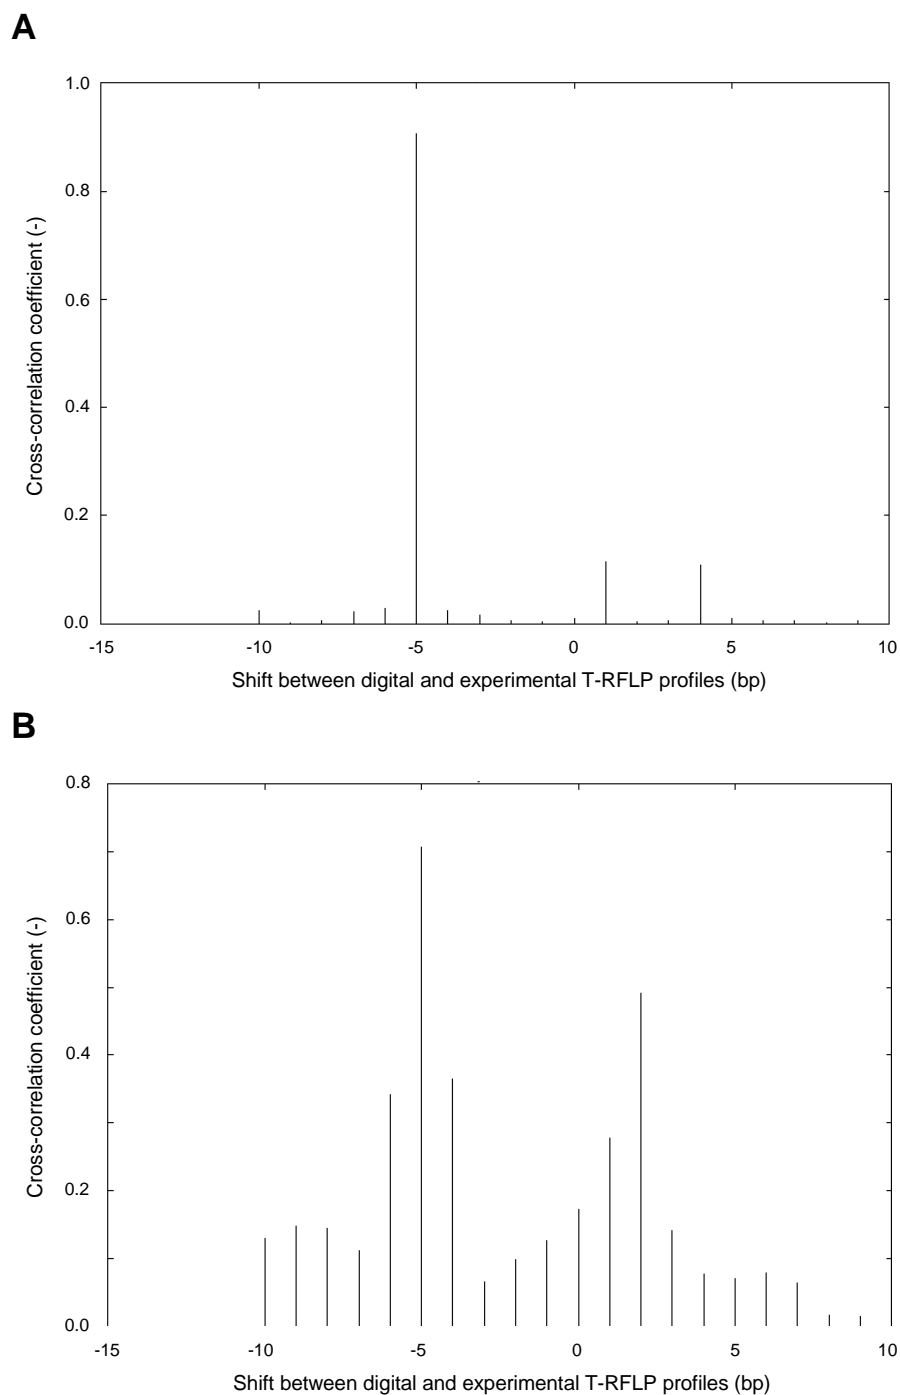

**Figure AF6.1 – Assessment of cross-correlation and optimal lag between denoised dT-RFLP and eT-RFLP profiles**

The denoised dT-RFLP profiles of the samples AGS07 (**A**) and GRW04 (**B**) were both shifted with optimal lags of -5 bp to match with the related eT-RFLP profiles. At these optimal lags, the maximum cross-correlation coefficients amounted to 0.91 (AGS07) and 0.71 (GRW04).
